# Supplementary material
Source: MDPI journal article supplement (https://www.mdpi.com/2073-4395/12/12/2921)
Supplement: s1 [file s1]

## Article

# Water saving using thermal imagery-based thresholds for timing irrigation in potatoes under drip and furrow irrigation systems

Javier Rinza <sup>1</sup> , David A. Ramírez <sup>1,2\*</sup> , Johan Ninanya <sup>1,3</sup> , Felipe de Mendiburu <sup>4</sup> , Jerónimo García <sup>3</sup>  and Roberto Quiroz <sup>5</sup> 

<sup>1</sup> International Potato Center (CIP), Headquarters P.O. Box 1558, Lima 15024, Peru; j.rinza@cgiar.org (J.R.)

<sup>2</sup> Water Resources Doctoral Program, Universidad Nacional Agraria La Molina (UNALM), Lima 15024, Peru; d.ramirez@cgiar.org (D.A.R.)

<sup>3</sup> Applied Meteorology Master Program, Universidad Nacional Agraria La Molina (UNALM), Lima 15024, Peru; j.ninanya@cgiar.org (J.N.); jgarciavi@lamolina.edu.pe (J.G.)

<sup>4</sup> Academic Department of Statistics and Informatics, Faculty of Economics and Planning, Universidad Nacional Agraria La Molina (UNALM), Lima 15024, Peru; fmendiburu@lamolina.edu.pe (F.d.M.)

<sup>5</sup> CATIE - Centro Agronómico Tropical de Investigación y Enseñanza, Cartago Turrialba 30501, Costa Rica.; roberto.quiroz@catie.ac.cr (R.Q.).

**Table S1.** Climate conditions in the study zone 2013–2020. Dataset Rinza et al. [1].

| Month | T <sub>a</sub><br>(°C) | T <sub>max</sub><br>(°C) | T <sub>min</sub><br>(°C) | HR<br>(%) | V<br>(ms <sup>-1</sup> ) | VPD<br>(kPa) | SR<br>(MJd <sup>-1</sup> ) | Rain<br>(mm) | E <sub>0</sub><br>(mm) |
|-------|------------------------|--------------------------|--------------------------|-----------|--------------------------|--------------|----------------------------|--------------|------------------------|
| Jan   | 23.1                   | 30.9                     | 18.2                     | 76.5      | 1.4                      | 0.7          | 17.6                       | 2.0          | 3.7                    |
| Feb   | 24.5                   | 32.5                     | 18.8                     | 73.8      | 1.4                      | 0.9          | 18.2                       | 0.3          | 4.1                    |
| Mar   | 24.2                   | 31.1                     | 18.2                     | 72.2      | 1.4                      | 0.9          | 19.1                       | 0.7          | 4.2                    |
| Apr   | 21.8                   | 29.6                     | 16.0                     | 76.6      | 1.2                      | 0.7          | 17.6                       | 0.3          | 3.3                    |
| May   | 19.3                   | 28.7                     | 13.5                     | 82.4      | 1.1                      | 0.4          | 11.2                       | 0.3          | 2.2                    |
| Jun   | 17.2                   | 25.4                     | 12.9                     | 86.5      | 1.0                      | 0.3          | 7.3                        | 0.6          | 1.4                    |
| Jul   | 15.9                   | 24.3                     | 11.6                     | 88.8      | 0.9                      | 0.2          | 6.8                        | 1.1          | 1.3                    |
| Aug   | 15.5                   | 23.7                     | 12.1                     | 88.9      | 0.9                      | 0.2          | 8.6                        | 0.6          | 1.4                    |
| Set   | 16.1                   | 24.1                     | 12.4                     | 88.3      | 1.1                      | 0.2          | 10.8                       | 0.5          | 1.9                    |
| Oct   | 17.2                   | 24.4                     | 12.0                     | 84.9      | 1.2                      | 0.3          | 14.7                       | 0.1          | 2.5                    |
| Nov   | 18.5                   | 25.8                     | 13.3                     | 81.7      | 1.2                      | 0.4          | 15.4                       | 0.6          | 2.9                    |
| Dec   | 20.5                   | 27.7                     | 15.4                     | 80.7      | 1.3                      | 0.5          | 16.3                       | 0.1          | 3.0                    |

T<sub>a</sub> – average temperature; T<sub>max</sub> – maximum temperature; T<sub>min</sub> – minimum temperature; RH – relative humidity; V – wind speed; VPD – vapor pressure deficit; SR – Solar radiation; E<sub>0</sub> – potential evapotranspiration.

**Table S2.** Summary of crop management information of drip irrigation (DI) and furrow irrigation (FI) for different treatments: T1 – control, T2 – 0.4 of CWSI, and T3 – 0.7 of CWSI. CWSI – Crop water stress index. Rinza et al. [2] dataset.

| Input data                                                                                        | Trial A     |             |             |             |             |             | Trial B     |             |             |             |             |             | Trial C               |                       |                       |
|---------------------------------------------------------------------------------------------------|-------------|-------------|-------------|-------------|-------------|-------------|-------------|-------------|-------------|-------------|-------------|-------------|-----------------------|-----------------------|-----------------------|
|                                                                                                   | DI-T1       | DI-T2       | DI-T3       | FI-T1       | FI-T2       | FI-T3       | DI-T1       | DI-T2       | DI-T3       | FI-T1       | FI-T2       | FI-T3       | DI-T1                 | DI-T2                 | DI-T3                 |
| crop area (m <sup>2</sup> )                                                                       | 45          | 45          | 45          | 45          | 45          | 45          | 45          | 45          | 45          | 45          | 45          | 45          | 71.1                  | 71.1                  | 71.1                  |
| Harvested amount (kg)                                                                             | 209.7       | 127.8       | 81.8        | 188.4       | 127.8       | 75.1        | 156.7       | 140.4       | 73.5        | 183.5       | 187.1       | 75.3        | 352.1                 | 315.0                 | 214.0                 |
| Seed amount                                                                                       | 57.6        | 57.6        | 57.6        | 57.6        | 57.6        | 57.6        | 57.6        | 57.6        | 57.6        | 57.6        | 57.6        | 57.6        | 108                   | 108                   | 108                   |
| Soil texture                                                                                      | Sandy loam            | Sandy loam            | Sandy loam            |
| Soil organic matter (%)                                                                           | 1.4         | 1.4         | 1.4         | 1.4         | 1.4         | 1.4         | 1.4         | 1.4         | 1.4         | 1.4         | 1.4         | 1.4         | 1.5                   | 1.5                   | 1.5                   |
| Soil pH                                                                                           | 7.63        | 7.63        | 7.63        | 7.63        | 7.63        | 7.63        | 7.63        | 7.63        | 7.63        | 7.63        | 7.63        | 7.63        | 7.60                  | 7.60                  | 7.60                  |
| Fertilizer amount (dose kg ha <sup>-1</sup> of N:P <sub>2</sub> O <sub>5</sub> :K <sub>2</sub> O) | 180:100:160 | 180:100:160 | 180:100:160 | 180:100:160 | 180:100:160 | 180:100:160 | 180:100:160 | 180:100:160 | 180:100:160 | 180:100:160 | 180:100:160 | 180:100:160 | 160:80:180 and 60:30* | 160:80:180 and 60:30* | 160:80:180 and 60:30* |
| Irrigated water (m <sup>3</sup> )                                                                 | 11.1        | 9.1         | 7.5         | 17.5        | 12.6        | 11.1        | 14.8        | 13.1        | 9.8         | 21.4        | 18.3        | 12.1        | 12.4                  | 8.7                   | 5.6                   |
| Chemical pest applications                                                                        | 1-2-2       | 1-2-2       | 1-2-2       | 1-2-2       | 1-2-2       | 1-2-2       | 1-2-4       | 1-2-4       | 1-2-4       | 1-2-4       | 1-2-4       | 1-2-4       | 1-2-1                 | 1-2-1                 | 1-2-1                 |
| Energy use (field hydro-electric, kWh)                                                            | 7.0         | 6.5         | 6.3         | 15.5        | 10.9        | 9.3         | 8.7         | 8.4         | 7.9         | 20.2        | 17.2        | 10.9        | 2.7                   | 1.7                   | 1.2                   |
| Energy use (field petrol, liters)                                                                 | 2.1         | 2.1         | 2.1         | 2.1         | 2.1         | 2.1         | 2.1         | 2.1         | 2.1         | 2.1         | 2.1         | 2.1         | 4.8                   | 4.8                   | 4.8                   |
| Off-farm transport (distance, km)                                                                 | 0.3         | 0.3         | 0.3         | 0.3         | 0.3         | 0.3         | 2.1         | 2.1         | 2.1         | 2.1         | 2.1         | 2.1         | 4.8                   | 4.8                   | 4.8                   |
| Harvest date                                                                                      | 10-Oct-2017 | 10-Oct-2017 | 10-Oct-2017 | 10-Oct-2017 | 10-Oct-2017 | 10-Oct-2017 | 15-Jan-2018 | 15-Jan-2018 | 15-Jan-2018 | 15-Jan-2018 | 15-Jan-2018 | 15-Jan-2018 | 13-Sep-2018           | 13-Sep-2018           | 13-Sep-2018           |

\* Doses kg ha<sup>-1</sup> of CaO:MgO; \*\* Application rate of 0.5 kg ha<sup>-1</sup>.

**Table S3.** Pearson correlation matrix for agronomic (FTY – Fresh tuber yield and IW – total irrigated water), environmental (TE – Total emissions carbon), and economic (BCR – Benefit cost ratio) indicators.

| FTY |       |       |      |
|-----|-------|-------|------|
| IW  | 0.22  | IW    |      |
| TE  | -0.92 | -0.23 | TE   |
| BCR | 0.68  | 0.58  | 0.60 |

## References

1. Rinza, J.; Ramírez, D.A.; Ninanya, J.; Yactayo, W. "Dataset for: Meteorological data at La Molina CIP experimental station from 2013 to 2020". *International Potato Center*, **2021**, V1. [[CrossRef](#)]
2. Rinza, J.; Ninanya, J.; Ramírez, D.A. "Dataset for: Estimating carbon footprint in potato trials under drip and furrow irrigation". *International Potato Center*, **2021**, V1. [[CrossRef](#)]
